# Supplementary material for: Investigation of the Neuroprotective Impact of Nimodipine on Neuro2a Cells by Means of a Surgery-Like Stress Model
Source: MDPI journal article supplement (doi:10.3390/ijms151018453), 2014-10-14

## Supplementary Information

**Figure S1.** LDH measurement after osmotic stress. Values are given as the mean  $\pm$  SD (error bars) of one representative out of at least three biologically independent experiments. Nim = nimodipine.

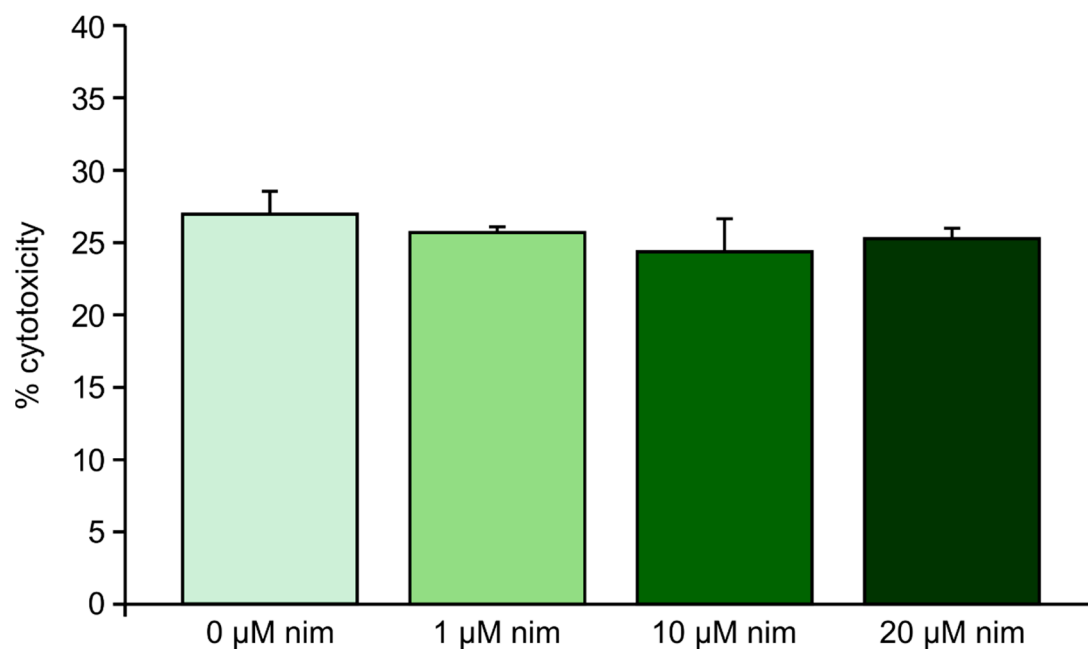

**Figure S2.** (a) Live/dead staining with FDA and PI. enlargement of microscopy pictures (control, EtOH stress) –nim = w/o nimodipine; +nim = 20  $\mu$ M nimodipine; control = non-stressed cells; EtOH = 2% ethanol; (b) Live/dead staining with FDA and PI. enlargement of microscopy pictures (control, EtOH stress) –nim = w/o nimodipine; +nim = 20  $\mu$ M nimodipine; heat = 6 h, 42  $^{\circ}$ C; mech = shaking with steel beads; and (c) Live/dead staining with FDA and PI enlargement of microscopy pictures (control, EtOH stress) –nim = w/o nimodipine; +nim = 20  $\mu$ M nimodipine; NaCl = 150 mM NaCl; scale bar = 200  $\mu$ m.

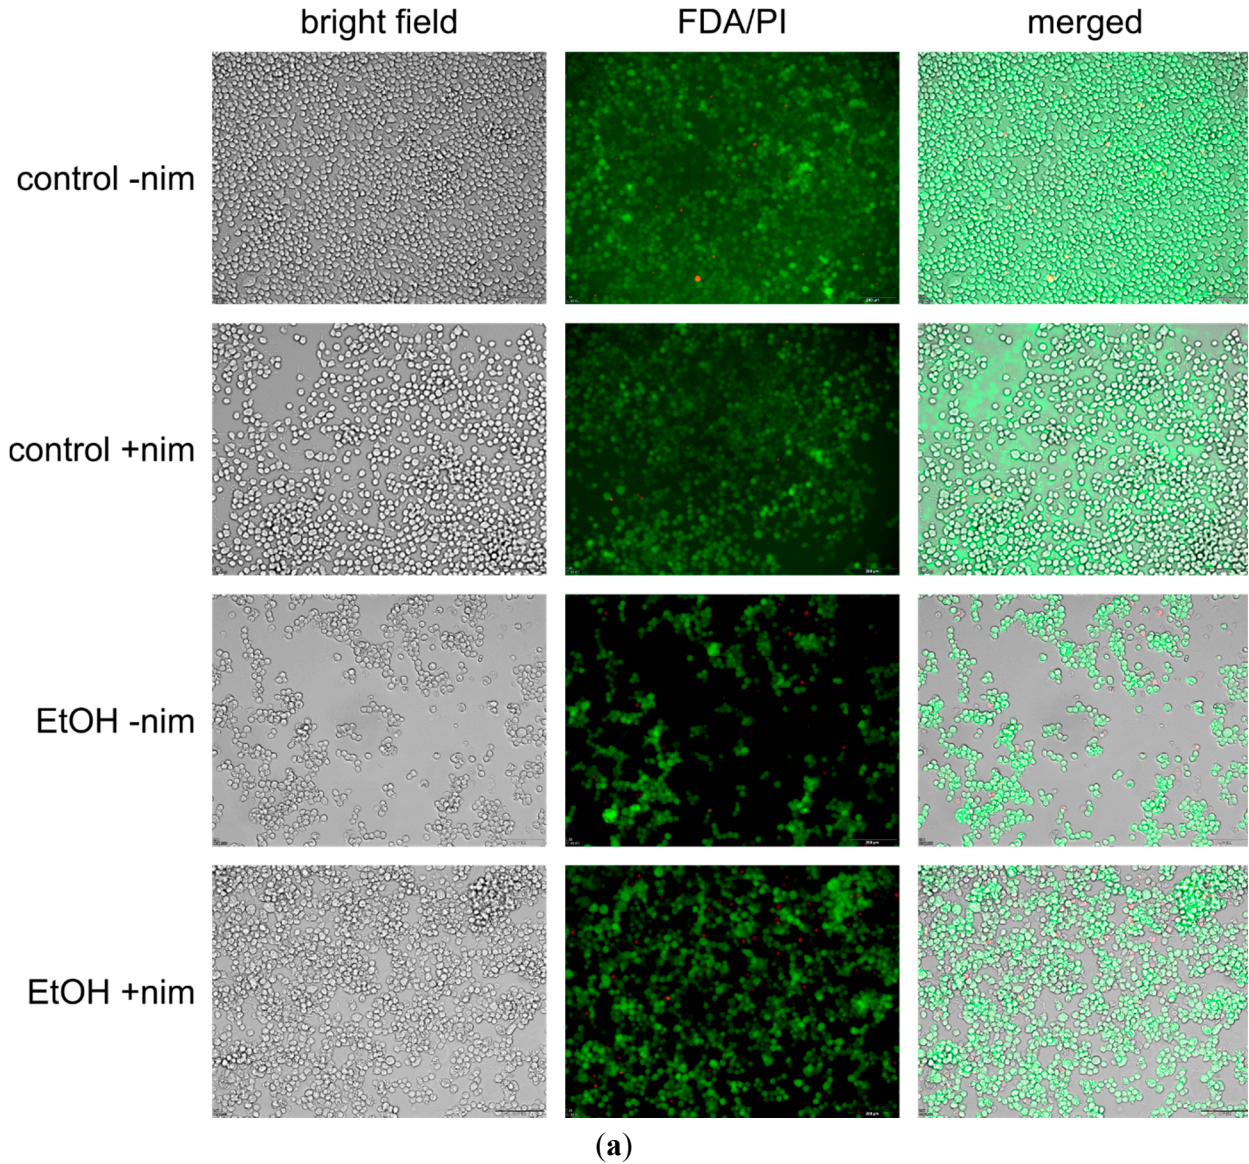



**Figure S2. Cont.**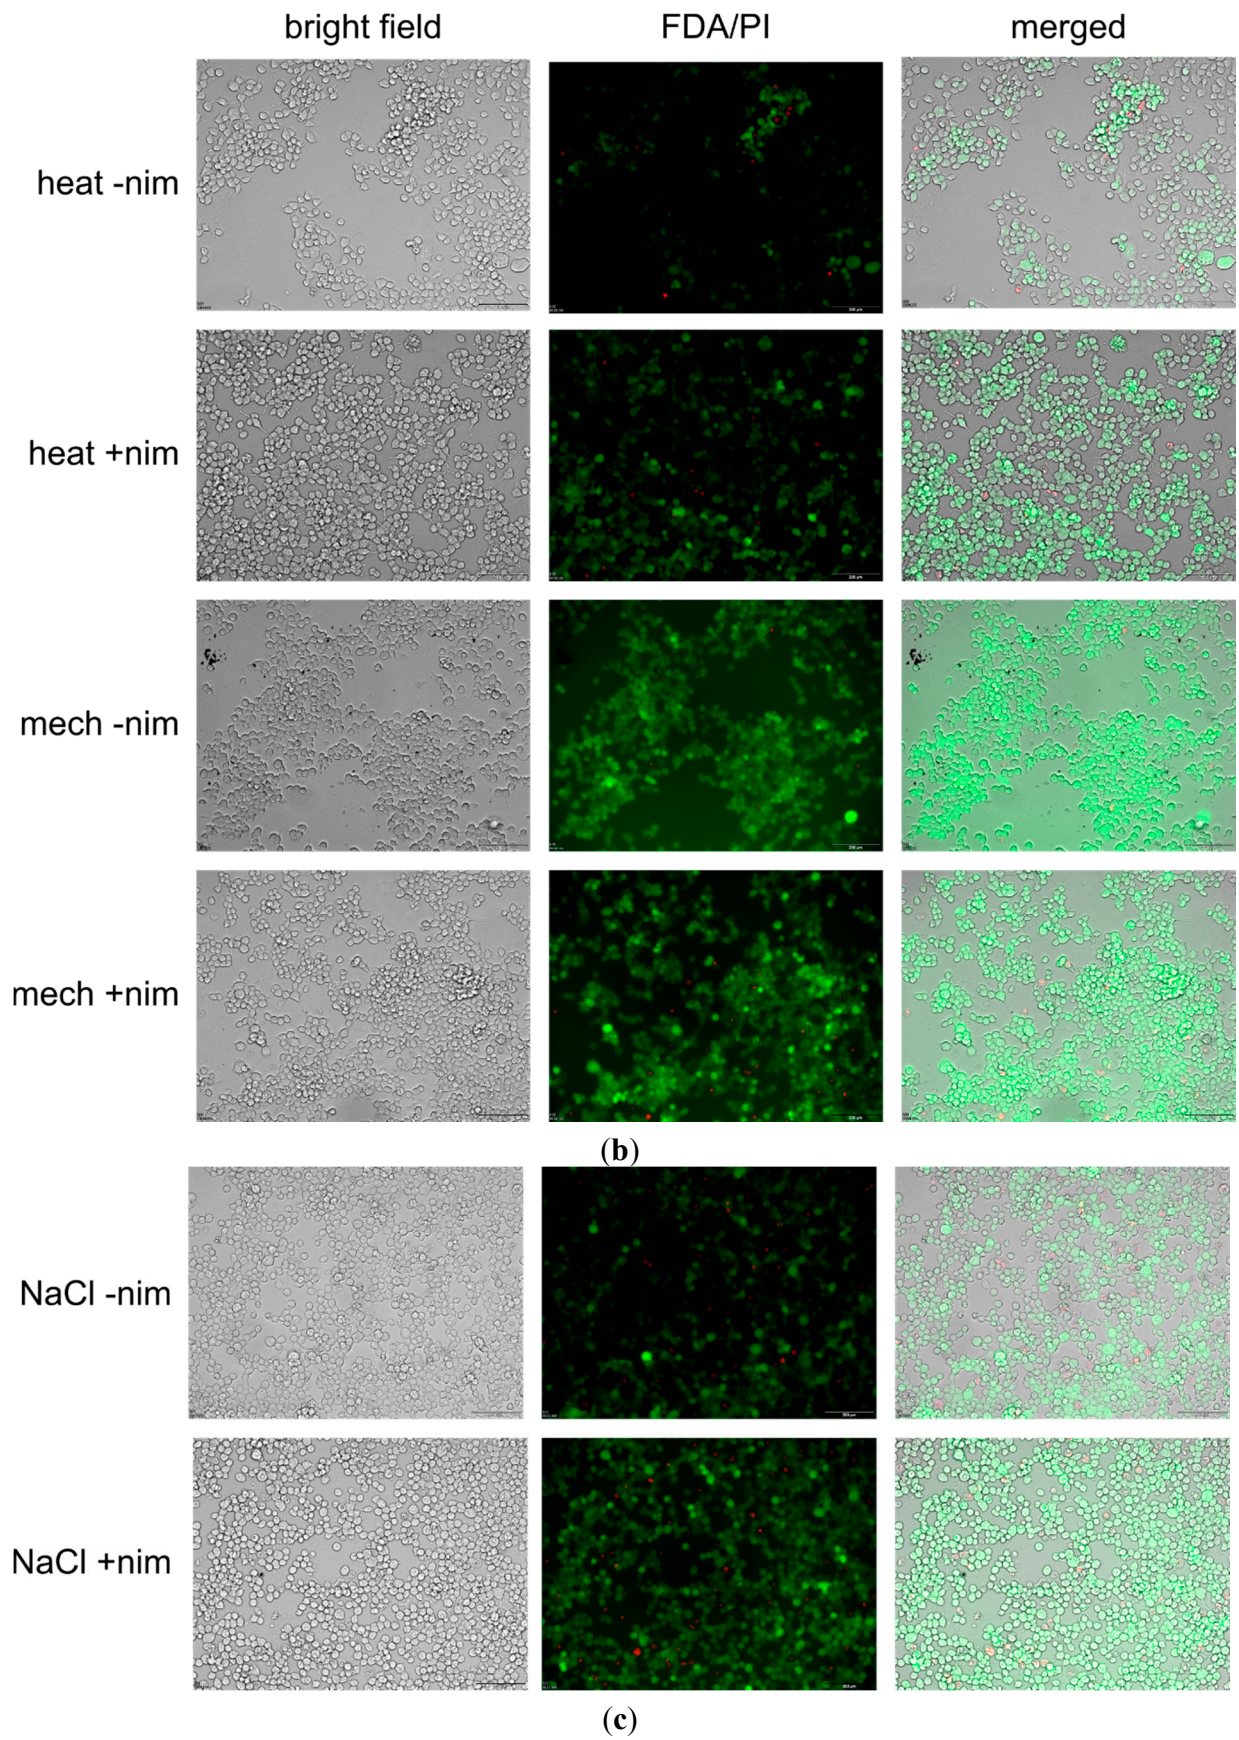

Supplement: s1 [file s1]
